# Supplementary material
Source: HighWire-hosted journal article supplement (https://diabetes.diabetesjournals.org/content/suppl/2007/01/31/db06-1580)
Supplement: Online_-only_data-table_1_2_and_supplementary_Fig_1.pdf [file Online_-only_data-table_1_2_and_supplementary_Fig_1.pdf]

Table 1. Duplex stealth RNAi sequences used in this study

| Genes     | RNAi sequences                                                     |
|-----------|--------------------------------------------------------------------|
| APPL1     | 5' UAGCAGAUAGUCGUUGUCCUUUAGC 3'<br>5' GCUAAAGGACAACGACUAUCUGCUA 3' |
| AdipoR1   | 5' AAUGGGCUCCAAAUCUCCUUGGUGG 3'<br>5' CCACCAAGGAGAUUUGGAGCCCAUU 3' |
| AdipoR2   | 5' CACACCUGACCUCAAAACUTT 3'<br>5' AGUUUUGAGGUCAGGUGUGTT 3'         |
| Scrambled | Invitrogen Stealth™ RNAi Negative Control Med GC                   |

Table 2. Information for the expression vectors constructed in this study

| Construct names  | Primer sequences                                                                                                                  | Parental vectors |
|------------------|-----------------------------------------------------------------------------------------------------------------------------------|------------------|
| pEGFP-APPL-1     | F: 5' CTTAAGCTTATGCCGGGGATC GACAAG 3'<br>R: 5' CTTGGTACCTCATTATGCTTCTGATTCTCTCTTCTT 3'                                            | pEGFP-C3         |
| pc-APPL1-FLAG    | F: 5' CCTAAGCTTATGGATTACAAGGATGACGACGATAAG CCGGGGATCGACAAGCTGCCCATCGAGGA GACG 3'<br>R: 5' CGCCTCGAGTCATTATGCTTCTGATTCTCTCTTCTT 3' | pcDNA3.1(+)      |
| pc-APPL1-N-FLAG  | F: 5' CCTAAGCTTATGGATTACAAGGATGACGACGATAA GCCGGGGATCGACAAGCTGCCCATCGAGGAGACG 3'<br>R: 5'CGCCTCGAGTCATGAACTGCTGGTTCGAGCTGT 3'      | pcDNA3.1(+)      |
| pc--APPL1-C-FLAG | F: 5'CTTAAGCTTATGGATTACAAGGATGACGACGATAA GGCTCTGGAAGCTGTCACCTTCCCCATCTTTC 3'<br>R: 5' CGCCTCGAGTCATTATGC TTCTGATTCTCTCTTCTT 3'    | PcDNA3.1 (+)     |
| GST-AdipoR1-C    | F: 5' CTTGAATTCATGTCTTCCCACAAAGGATCTGTGG 3'<br>R: 5' ATTCTCGAGTTCTGTATGAATGCGGAAGAT 3'                                            | pGEX4T-1         |
| GST-AdipoR2-C    | F: 5' CTTGAATTCATGAACGAGCCAACAGAAAAC 3'<br>R: 5' ATTCTCGAGTTCTGTGTGTATTCTGAAAATGC 3'                                              | pGEX4T-1         |
| pc-AdipoR1-FLAG  | F: 5' GTCAGGGATCCGCTGAAGCTGCAGGGTATTG 3'<br>R: 5' GATCGCTCGAGTCACTTGTCATCGTCGTCCTTGTAG TCGAGAAGGGTGCATCAGTAC 3'                   | pCDNA3.1(+)      |
| pc-AdipoR2-Myc   | F: 5' GACTAGAATTCTCCCAAGAAGTCCGAGACAC 3'<br>R: 5' GATCGCTCGAGTCACAGATCCTCTTCTGAGATGAGTT TTTGTTCCAGTGCATCCTCTTCACTGC 3'            | pCDNA3.1(+)      |

Note that the nucleotides underlined are restriction enzyme cut sites.

Supplementary Fig. 1

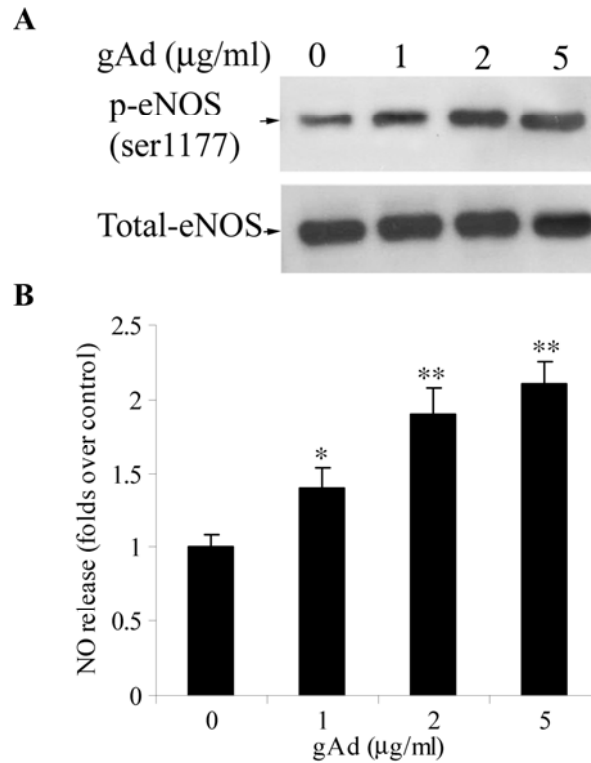

**Supplementary Figure 1:** Effect of globular adiponectin on eNOS phosphorylation at Ser<sup>1177</sup> and NO production in HUVECs. Cells were treated with various concentration of globular adiponectin (gAd) as indicated. A: 50  $\mu\text{g}$  of total cell lysates harvested at 15 min after stimulation was separated by SDS – PAGE, and probed with anti-phospho eNOS (Ser<sup>1177</sup>) and anti total eNOS. B. NO released into conditioned medium at 60 min after stimulation with globular adiponectin. \* P<0.05; \*\* P<0.01 versus untreated control (n=5-6).
